# Supplementary material for: Long non-coding RNA HOXB-AS3 promotes myeloid cell proliferation and its higher expression is an adverse prognostic marker in patients with acute myeloid leukemia and myelodysplastic syndrome
Source: Springer Nature journal article supplement (doi:10.1186/s12885-019-5822-y), 2019-06-24
Supplement: MOESM1 [file 16847732]

## **Supplementary Data**

| <b>Table of Contents</b>                                                                                                                                                                                                      | <b>Page</b> |
|-------------------------------------------------------------------------------------------------------------------------------------------------------------------------------------------------------------------------------|-------------|
| <b>Supplementary Methods</b>                                                                                                                                                                                                  | <b>1</b>    |
| <b>Table S1.</b> Correlation of <i>HOXB-AS3</i> expression with clinical characteristics and frequent somatic gene mutations in <i>de novo</i> AML patients                                                                   | <b>6</b>    |
| <b>Table S2.</b> Correlation of <i>HOXB-AS3</i> expression with clinical characteristics in MDS patients                                                                                                                      | <b>7</b>    |
| <b>Table S3.</b> Correlation of <i>HOXB-AS3</i> expression with frequent gene mutations in MDS patients                                                                                                                       | <b>9</b>    |
| <b>Figure S1.</b> Overview of <i>Hoxb5os</i> in mouse HOXB cluster.                                                                                                                                                           | <b>10</b>   |
| <b>Figure S2.</b> Alignment of mouse <i>Hoxb5os</i> and human <i>HOXB-AS3</i> .                                                                                                                                               | <b>11</b>   |
| <b>Figure S3.</b> <i>HOXB-AS3</i> promotes S phase entering in the cell cycle regulation.                                                                                                                                     | <b>12</b>   |
| <b>Figure S4.</b> GSEA pathway analysis of the differentially expressed genes in <i>HOXB-AS3</i> knockdown cells compared to the control cells.                                                                               | <b>13</b>   |
| <b>Figure S5.</b> Cell cycle pathway from Wikipathway analysis of downstream pathways affected by downregulation of <i>HOXB-AS3</i> in the myeloid cell lines.                                                                | <b>14</b>   |
| <b>Figure S6.</b> DNA replication pathway from Wikipathway analysis of downstream pathways affected by downregulation of <i>HOXB-AS3</i> in the myeloid cell lines.                                                           | <b>15</b>   |
| <b>Figure S7.</b> RB pathway from Wikipathway analysis of downstream pathways affected by downregulation of <i>HOXB-AS3</i> in the myeloid cell lines.                                                                        | <b>16</b>   |
| <b>Figure S8.</b> G1-S pathway from Wikipathway analysis of downstream pathways affected by downregulation of <i>HOXB-AS3</i> in the myeloid cell lines.                                                                      | <b>17</b>   |
| <b>Figure S9.</b> Quantitative PCR analysis of the expressions of indicated genes in TF-1 cells infected with lentivirus carrying pAS5.1w-Pbsd (control), or pAS5.1w-Pbsd- <i>HOXB-AS3</i> ( <i>HOXB-AS3</i> overexpression). | <b>18</b>   |
| <b>Figure S10.</b> <i>HOXB-AS3</i> expressions of AML patients and health donors.                                                                                                                                             | <b>19</b>   |
| <b>Figure S11.</b> Survival analysis of AML patients stratified by the expressions of <i>HOXB-AS3</i> .                                                                                                                       | <b>20</b>   |
| <b>Figure S12.</b> <i>HOXB-AS3</i> expression of non-APL AML patients and health donors.                                                                                                                                      | <b>21</b>   |
| <b>Figure S13.</b> Survival analysis of non-APL AML patients stratified by the expressions of <i>HOXB-AS3</i> in the NTUH AML cohort.                                                                                         | <b>22</b>   |
| <b>Figure S14.</b> <i>HOXB-AS3</i> expressions of MDS patients and health donors.                                                                                                                                             | <b>23</b>   |
| <b>Figure S15.</b> Overall survival of MDS patients stratified by the expressions of <i>HOXB-AS3</i> .                                                                                                                        | <b>24</b>   |
| <b>Figure S16.</b> Quantitative PCR analysis of the expressions of different variants in TF-1 and OCI/AML3 cell lines.                                                                                                        | <b>25</b>   |
| <b>Supplementary References</b>                                                                                                                                                                                               | <b>26</b>   |

## **Supplementary Methods**

### *Microarray experiments*

Five microgram total RNA per sample was purified by TRIzol or Nucleospin® RNA purification kit (Macherey-Nagel GmbH & Co. KG, Germany) with genomic DNA digestion. The RNA was sent to the National Health Research Institutes, Taiwan, and Affymetrix Gene Expression Service Lab, Academia Sinica, Taiwan, for microarray experiments. RNA concentrations and qualities were checked by Bioanalyzer. Total RNA was used for cDNA synthesis, and labeled by *in vitro* transcription following the manufacturer's instructions of Affymetrix GeneChip® Human Transcriptome Array 2.0 (HTA 2.0). After labeling, cDNA was hybridized for 16 hours at 45°C on GeneChip® Human Transcriptome Array 2.0 in Hybridization Oven 645. GeneChips® were washed and stained in the Affymetrix Fluidics Station 450. GeneChips® were scanned by using Affymetrix GeneChip Command Console installed with a GeneChip® Scanner 7G.

### *Microarray data analysis*

The raw data were normalized with Robust Multichip Analysis (RMA) algorithm by Affymetrix® Expression Console™ Software. Further analysis of microarrays was performed with Affymetrix® Transcriptome Analysis Console (TAC) software ([http://www.affymetrix.com/estore/catalog/prod760001/AFFY/Transcriptome+Analysis+Console+%28TAC%29+Software#1\\_1](http://www.affymetrix.com/estore/catalog/prod760001/AFFY/Transcriptome+Analysis+Console+%28TAC%29+Software#1_1)), BRB-Array Tools v4.5.0 stable (provide by National Cancer Institute, National Institutes of Health; <https://brb.nci.nih.gov/BRB-ArrayTools/>), and Gene Set Enrichment Analysis (GSEA) software for pathway analysis (<http://software.broadinstitute.org/gsea/index.jsp>). [1, 2]

### *Cell cultures*

OCI/AML3 and TF-1 were myeloid cell lines. TF-1 cell line was purchased from Bioresource Collection and Research Center, Hsinchu, Taiwan. OCI/AML3 was a gift from Dr. Minden (Ontario Cancer Institute/Princess Margaret Hospital, Canada). TF-1 was cultured in RPMI 1640 medium (ATCC Modification, Gibco®) with 10% heat-inactivated fetal bovine serum (FBS), 100 units per milliliter penicillin, 100 micrograms per milliliter streptomycin (Gibco®), and 4 nanograms per milliliter GM-CSF (GM-CSF Recombinant Human Protein, Gibco® PHC2011). OCI/AML3 was cultured in RPMI 1640 medium (ATCC Modification, Gibco®) with 100 units per milliliter penicillin, 100 microgram per

milliliter streptomycin (Gibco®), and 10% heat-inactivated FBS.

### ***Constructions of lentiviral vectors with shRNA and lncRNA, and lentiviral production***

RNAi reagents and vectors (pLKO\_AS1010 for shRNA, pLAS5w.Pbsd for overexpression of lncRNAs, the packaging plasmid pCMV- $\Delta$ R8.91 and the envelope plasmid pMD.G) were purchased from the National Core Facility for Manipulation of Gene Function by RNAi, miRNA, miRNA sponges, and CRISPR/Genomic Research Center, Academia Sinica, Taiwan, supported by the National Core Facility Program for Biotechnology Grants of MOST (MOST 104-2319-B-001-001; also known as, “RNAi Core Lab, Academia Sinica, Taiwan”). The designs and constructs of shRNA and cDNA were performed according to the protocols provided by RNAi Core Lab, Academia Sinica, Taiwan.

Briefly, human *HOXB-AS3* variant 2 (GenBank accession code: NR\_033202.2) was PCR amplified and cloned into pLAS5w.Pbsd between *NheI* and *PmeI* sites. *HOXB-AS3* shRNAs were designed according to the algorithm of The RNAi Consortium shRNA Library, Broad Institute. The sense and antisense oligonucleotides were annealed and ligated into pLKO\_AS1010 digested by *AgeI* and *EcoRI*. Because most variants of *HOXB-AS3* contain exon 4 and 6, we designed two shRNAs to target each of these two exons (Figure 1a). The target sequences of sh*HOXB-AS3* and sh*LacZ* were as follows; sh*HOXB-AS3*#1: GGACCCACCAACCAAGGAGCT (targeting exon 4 of *HOXB-AS3*), sh*HOXB-AS3*#2: GGCACTCACTTGCAGACATCA (targeting exon 6 of *HOXB-AS3*), and sh*LacZ*: CGCGATCGTAATCACCCGAGT.

The lentiviral production was performed according to the protocol of RNAi Core Lab, Academia Sinica, Taiwan. The lentivirus was concentrated with Lentix-X solution (Clontech®) according to the manufacturer’s protocol. The concentrated lentiviral particles were suspended in DMEM with 20% heat-inactivated FBS, 100 units per milliliter penicillin, and 100 micrograms per milliliter streptomycin (Gibco®).

### ***Lentivirus infection to generate stable cell lines***

The concentrated lentiviral solution was mixed with suspension cells and polybrene with a final concentration of 8 micrograms per milliliter. The mixture of lentivirus and suspension cells were incubated at 37°C for 24 hours. Then, the cells were centrifuged at 1000 rpm for 5 minutes at room temperature. The supernatant with lentivirus was removed, and the suspension cells were

refreshed with the medium used to maintain the cell lines. Two days later, blasticidin or puromycin was added in the medium for drug selection. After seven days of drug selection, the survived cells were used for validation and further experiments.

### *Quantitative real time PCR*

Total RNA was isolated from cells by Nucleospin® RNA kit (Macherey-Nagel GmbH & Co. KG, Germany). Two micrograms RNA was used to synthesize complementary DNA (cDNA) by iScript™ cDNA Synthesis Kit (Bio-Rad Laboratories, Inc). LightCycler® 480 SYBR Green I Master (Roche) was used for quantitative real time PCR. Quantitative real time PCR was performed with Roche LightCycler 480 II. The annealing temperature was 60°C. The primers were as the follows.

*β2 microglobulin* forward: 5'-AGCAGCATCATGGAGGTTTG-3';  
*β2 microglobulin* reverse: 5'-AGCCCTCCTAGAGCTACCTG-3';  
*18s rRNA* forward: 5'-ACGAAAGTCGGAGGTTTCGAA-3';  
*18s rRNA* reverse: 5'-GTGTTGAGTCAAATTAAGCCGCAG-3';  
*GAPDH* forward: 5'-GTCAGTGGTGGACCTGACCT-3';  
*GAPDH* reverse: 5'-ATACCAGGAAATGAGCTTGACAAAG-3';  
*MALAT1* forward: 5'-GAATTGCGTCATTTAAAGCCTAGTT -3';  
*MALAT1* reverse: 5'-GTTTCATCCTACCACTCCCAATTAAT-3';  
*NEAT1* forward: 5'-TCGGGTATGCTGTTGTGAAA-3';  
*NEAT1* reverse: 5'-TGACGTAACAGAATTAGTTCTTACCA-3';  
*HOXB-AS3* variant 2/3/5 forward: 5'-ACAACCGAGTGGAACTGACG-3';  
*HOXB-AS3* variant 2/3/5 reverse: 5'-AAGCCAAGGCTGTTCAAGGT-3'  
(targeting exon 6);  
*HOXB-AS3* variant 1/4 forward: 5'-GGCCCTATAGAAACCAGGACG-3';  
*HOXB-AS3* variant 1/4 reverse: 5'-GAAGGGAATGAGTCCGGGAG-3';  
*MCM3* forward: 5'-TCTGGGACCTTCAGGACTGT-3';  
*MCM3* reverse: 5'-TTGATGTCCCCACGGATGTG-3';  
*MCM4* forward: 5'-GATTCCCGAGATGCAGGAGG-3';  
*MCM4* reverse: 5'-GCACAGCTCGATAGATGCCT-3';  
*MCM6* forward: 5'-TCCAAGCTTAGCACACCAGG-3';  
*MCM6* reverse: 5'-GAACGCCACCAAAGAGCATC-3';  
*PCNA* forward: 5'-GGCCGAAGATAACGCGGATA-3';  
*PCNA* reverse: 5'-TGTCACCGTTGAAGAGAGTGG-3';  
*CKD1* forward: 5'-ACAGGTCAAGTGGTAGCCAT-3';  
*CKD1* reverse: 5'-CCATGTA CTGACCAGGAGGG-3';

CCNB2 forward: 5'-CACTCTTGCCTTCCCCGTC-3';  
CCNB2 reverse: 5'-AGCTACTTGTGCTGCTCTGG-3';  
CDC25A forward: 5'-GCAACCACTGGAGGTGAAGA-3';  
CDC25A reverse: 5'-TCATCTGGGTCGATGAGCTG-3'.

### *Proliferation assay*

After OCI/AML3 cells were infected with lentivirus containing shRNA for one night, the cells were refreshed with the culture medium for two days. On the fourth day, the GFP-positive cells were sorted for proliferation assay by BD FACSJazz at the Flow Cytometry Core Facility of the institute of Biomedical Sciences, Academia Sinica. On the Day 0,  $1 \times 10^6$  GFP-positive cells were seeded in 5 mL culture medium per flask, and three flasks per group. The cell numbers were counted for six consecutive days.

### *BrdU flow assay*

BD Pharmingen™ APC BrdU Flow Kits (Cat. NO. 552598) was used for BrdU cell proliferation assay. Cells were incubated with 10  $\mu$ M BrdU at 37°C for three hours, and then harvested for BrdU flow assay. The detailed method was described in the user manual of the manufacture. The flow cytometry was performed on LSR II (BD Bioscience, San Jose, CA) through the service provided by the Flow Cytometric Analyzing and Sorting Core Facility at the NTUH, and on FACS Canto II (BD Bioscience, San Jose, CA) through the service provided by the Molecular and Immune Function Laboratory at Tai Cheng Stem Cell Therapy Center at the National Taiwan University.

### *Nuclear-cytoplasm fractionation*

The detailed method of nuclear-cytoplasm fractionation for RNA was described previously.[3] Briefly,  $1 \times 10^6$  to  $1 \times 10^7$  cells were harvested and washed with PBS twice. Then, the cells were resuspended in 1 milliliter RSB (10 mM Tris, pH 7.4; 10 mM NaCl; 3mM MgCl<sub>2</sub>), incubated on ice for three minutes, and centrifuged at 4 °C with 4000 rpm for three minutes. The cells were resuspended with four times of its volume of lysis buffer RSBG40 (10 mM Tris, pH 7.4; 10 mM NaCl, 3 mM MgCl<sub>2</sub>; 10% glycerol; 0.5% Nonidet P-40; 0.5 mM dithiothreitol (DTT); and 100 units per milliliter rRNasin (Promega,WI)) by slow pipetting. The cells were centrifuged at 7000 rpm for three minutes. The supernatant was collected as the cytoplasmic fraction. The pellet was re-suspended with RSBG40, supplemented with one-tenth volume of detergent (3.3% (wt/wt) sodium deoxycholate and 6.6% (vol/vol) Tween 40) with slow

vortex, incubated on ice for five minutes, and centrifuged at 7000 rpm for three minutes to pellet nuclei again. The supernatant was pooled with the aforementioned cytoplasmic fraction. The nuclear pellet was washed with RSBG40 again, and centrifuged at 10,000 rpm for five minutes. The status of cell lysis was checked by the microscope. The nuclear pellet was resuspended in 250 microliters of lysis buffer RSBG40 and 1 milliliter TRIzol was added. The 250 microliters of cytoplasmic fraction was mixed with 1 milliliter TRIzol by vortex. The mixtures with TRIzol were incubated at the room temperature for five to ten minutes. RNA was extracted with TRIzol according to the manufacturer's instructions.

**Table S1. Correlation of HOXB-AS3 expression with clinical characteristics and frequent somatic gene mutations in *de novo* AML patients**

|                                                   | Total                       | HOXB-AS3 expression         |                           | P value      |
|---------------------------------------------------|-----------------------------|-----------------------------|---------------------------|--------------|
|                                                   |                             | Higher                      | Lower                     |              |
| <b>Patient number (n)</b>                         | 193                         | 96                          | 97                        |              |
| <b>Sex (n, %)</b>                                 |                             |                             |                           |              |
| Male                                              |                             | 42 (43.7%)                  | 60 (61.9%)                | 0.0120*      |
| Female                                            |                             | 54 (56.2%)                  | 37 (38.1%)                |              |
| <b>Age (years; median, range)</b>                 | 46.7<br>(16.1 – 82.7)       | 52.7<br>(16.1 – 76.8)       | 42.8<br>(18.2 – 82.7)     | 0.0010*      |
| <b>Laboratory (median, range)</b>                 |                             |                             |                           |              |
| WBC (k/ $\mu$ L)                                  | 27.770<br>(0.380 – 423.000) | 35.865<br>(0.380 – 423.000) | 23.530<br>(0.470-380.180) | 0.0684       |
| Hb (g/dL)                                         | 7.9<br>(3.3 – 13.0)         | 7.7<br>(3.7 – 12.1)         | 8.1<br>(3.3 – 13.0)       | 0.0946       |
| PLT (k/ $\mu$ L)                                  | 44.0<br>(2.0 – 493.0)       | 52.5<br>(5.0 – 412.0)       | 38.0<br>(2.0 – 493.0)     | 0.0449*      |
| LDH (U/L)                                         | 1019<br>(280 – 8280)        | 924<br>(280 – 7734)         | 1036<br>(286 – 8280)      | 0.4282       |
| Bone marrow blasts (%)                            | 63.0<br>(16.0 – 98.5)       | 61.3<br>(20.5 – 97.5)       | 65.5<br>(16.0 – 98.5)     | 0.1267       |
| Peripheral blood blasts (%)                       | 53.6<br>(0.0 – 99.0)        | 55.0<br>(1.0 – 99.0)        | 51.8<br>(0.0 – 95.0)      | 0.3927       |
| <b>Cytogenetic risk groups (n, %)<sup>#</sup></b> |                             |                             |                           | <<br>0.0001* |
| Favorable                                         | 44 (22.8%)                  | 4 (4.2%)                    | 40 (41.2%)                |              |
| Intermediate                                      | 119 (61.7%)                 | 71 (74.0%)                  | 48 (49.5%)                |              |
| Adverse                                           | 21 (10.9%)                  | 12 (12.5%)                  | 9 (9.3%)                  |              |
| Unknown                                           | 9 (4.7%)                    | 9 (9.4%)                    | 0 (0.0%)                  |              |
| <b>CR rate</b>                                    | 154 (79.8%)                 | 73 (76.0%)                  | 81 (83.5%)                | 0.1978       |
| <b>Relapse rate</b>                               | 82 (42.5%)                  | 46 (47.9%)                  | 36 (37.1%)                | 0.0306*      |
| <b>Somatic gene mutations (n, %)</b>              |                             |                             |                           |              |
| Mutated <i>NPM1</i> without <i>FLT3</i> -ITD      | 26 (13.5%)                  | 25 (26.0%)                  | 1 (1.0%)                  | <<br>0.0001* |
| <i>CEBP<math>\alpha</math></i> double mutation    | 25 (13.1%)                  | 4 (4.2%)                    | 21 (21.9%)                | 0.0004*      |
| <i>MLL</i> / <i>PTD</i>                           | 10 (5.2%)                   | 10 (10.4%)                  | 0 (0.0%)                  | 0.0007*      |
| <i>TP53</i>                                       | 4 (2.2%)                    | 4 (4.3%)                    | 0 (0.0%)                  | 0.0591       |
| <i>RUNX1</i>                                      | 22 (11.4%)                  | 17 (17.7%)                  | 5 (5.2%)                  | 0.0062*      |

\* P value &lt; 0.05.

Abbreviations: WBC, white blood cell count; Hb, hemoglobin; PLT, platelet count; LDH, lactic dehydrogenase; CR, complete remission; *MLL*/*PTD*, partial tandem duplication of *MLL* gene.

**Table S2. Correlation of HOXB-AS3 expression with clinical characteristics in MDS patients**

|                                            | Total                     | HOXB-AS3 expression     |                           | P value      |
|--------------------------------------------|---------------------------|-------------------------|---------------------------|--------------|
|                                            |                           | Higher                  | Lower                     |              |
| <b>Patient number (n)</b>                  | 157                       | 39                      | 118                       |              |
| <b>Sex (n, %)</b>                          |                           |                         |                           |              |
| Male                                       | 107 (68.2%)               | 31 (79.5%)              | 76 (64.4%)                | 0.0807       |
| Female                                     | 50 (31.8%)                | 8 (20.5%)               | 42 (35.6%)                |              |
| <b>Age (years; median, range)</b>          | 69<br>(19 – 94)           | 71<br>(29 – 89)         | 69<br>(19 – 94)           | 0.5209       |
| <b>Laboratory (median, range)</b>          |                           |                         |                           |              |
| WBC (k/ $\mu$ L)                           | 3.700<br>(0.490 – 20.440) | 3.830<br>(0.490-20.440) | 3.700<br>(1.210 – 15.010) | 0.8892       |
| Hb (g/dL)                                  | 8.2<br>(3.5 – 14.6)       | 8.7<br>(5.6 – 13.0)     | 8.0<br>(3.5 – 14.6)       | 0.0186*      |
| PLT (k/ $\mu$ L)                           | 85.0<br>(3.0 – 721.0)     | 84.0<br>(9.0 – 721.0)   | 87.5<br>(3.0 – 607.0)     | 0.8374       |
| LDH (U/L)                                  | 460<br>(145 – 2695)       | 527<br>(230 – 1481)     | 453<br>(145 – 2695)       | 0.2909       |
| Bone marrow blasts (%)                     | 3 (0 - 18.8)              | 9 (0.8 – 18.8)          | 2 (0 – 17.2)              | <<br>0.0001* |
| Peripheral blood blasts (%)                | 0 (0 – 16)                | 0 (0 – 16.0)            | 0 (0 – 13.0)              | 0.1037       |
| <b>IPSS risk group (n, %)<sup>#</sup></b>  |                           |                         |                           | 0.1513       |
| Low                                        | 31 (20.3%)                | 5 (13.2%)               | 26 (22.6%)                |              |
| Intermediate-1                             | 72 (47.1%)                | 15 (39.5%)              | 57 (49.6%)                |              |
| Intermediate-2                             | 35 (22.9%)                | 13 (34.2%)              | 22 (19.1%)                |              |
| High                                       | 15 (9.8%)                 | 5 (13.2%)               | 10 (8.7%)                 |              |
| <b>WHO 2016 classification (n, %)</b>      |                           |                         |                           | 0.0077*      |
| MDS with del(5q)                           | 3 (1.9%)                  | 0                       | 3 (2.5%)                  |              |
| SLD                                        | 35 (22.3%)                | 4 (10.3%)               | 31 (26.3%)                |              |
| MLD                                        | 32 (20.4%)                | 5 (12.8%)               | 27 (22.9%)                |              |
| RS-SLD                                     | 11 (7.0%)                 | 3 (7.7%)                | 8 (6.8%)                  |              |
| RS-MLD                                     | 7 (4.5%)                  | 0                       | 7 (5.9%)                  |              |
| EB-1                                       | 29 (18.5%)                | 9 (23.1%)               | 20 (16.9%)                |              |
| EB-2                                       | 40 (25.5%)                | 18 (46.2%)              | 22 (18.6%)                |              |
| <b>Leukemia transformation rate (n, %)</b> | 34 (21.7%)                | 14 (35.9%)              | 20 (16.9%)                | 0.0130*      |

\* P value &lt; 0.05.

<sup>#</sup> Only 153 patients, including 38 with high HOXB-AS3 and 115 with low HOXB-AS3, had complete hemograms for IPSS calculation.

Abbreviations: WBC, white blood cell count; Hb, hemoglobin; PLT, platelet count; LDH, lactic dehydrogenase; IPSS, International Prognostic Scoring System; SLD, single lineage



*HOXB-AS3* in patients with myeloid malignancies

dysplasia; MLD, multilineage dysplasia; RS-SLD, ring sideroblasts with single lineage dysplasia; RS-MLD, ring sideroblasts with multilineage dysplasia; EB-1, excess blasts-1; EB-2, excess blasts-2.

**Table S3. Correlation of HOXB-AS3 expression with frequent gene mutations in MDS patients**

|                                 | Total      | HOXB-AS3 expression |            | P value |
|---------------------------------|------------|---------------------|------------|---------|
|                                 |            | Higher              | Lower      |         |
| <b>Patient number (n)</b>       | 157        | 39                  | 118        |         |
| <b>RUNX1 (n, %)</b>             | 25 (15.9%) | 14 (35.9%)          | 11 (9.3%)  | 0.0001* |
| <b>ASXL1 (n, %)<sup>#</sup></b> | 33 (21.3%) | 15 (39.5%)          | 18 (15.4%) | 0.0017* |
| <b>DNMT3A (n, %)</b>            | 24 (15.3%) | 6 (15.4%)           | 18 (15.3%) | 0.9844  |
| <b>EZH2 (n, %)</b>              | 10 (6.4%)  | 5 (12.8%)           | 5 (4.2%)   | 0.0579  |
| <b>IDH2 (n, %)<sup>#</sup></b>  | 4 (2.6%)   | 3 (7.9%)            | 1 (0.9%)   | 0.0178* |
| <b>KRAS (n, %)<sup>#</sup></b>  | 1 (0.6%)   | 0                   | 1 (0.8%)   | 0.5704  |
| <b>NRAS (n, %)</b>              | 3 (1.9%)   | 1 (2.6%)            | 2 (1.7%)   | 0.7319  |
| <b>TP53 (n, %)</b>              | 10 (6.4%)  | 1 (2.6%)            | 9 (7.6%)   | 0.2632  |
| <b>SETBP1 (n, %)</b>            | 4 (2.5%)   | 0                   | 4 (3.4%)   | 0.5628  |
| <b>SF3B1 (n, %)</b>             | 25 (15.9%) | 5 (12.8%)           | 20 (16.9%) | 0.5426  |
| <b>SRSF2 (n, %)</b>             | 23 (14.6%) | 9 (23.1%)           | 14 (11.9%) | 0.0870  |
| <b>TET2 (n, %)<sup>#</sup></b>  | 21 (13.5%) | 4 (10.3%)           | 17 (14.7%) | 0.4889  |
| <b>U2AF35 (n, %)</b>            | 12 (7.6%)  | 4 (10.3%)           | 8 (6.8%)   | 0.4801  |
| <b>ZRSR2 (n, %)<sup>#</sup></b> | 15 (10.0%) | 3 (7.9%)            | 12 (10.7%) | 0.6178  |

\* P value < 0.05, Chi-squared test

<sup>#</sup> Because of the limitation of DNA samples, not all patients had enough genomic DNA samples for analysis of these gene mutations. Thirty eight patients with high HOXB-AS3 and 117 with low HOXB-AS3 had genomic DNA for ASXL1 mutation analysis, 38 with high HOXB-AS3 and 117 with low HOXB-AS3 for IDH2 mutation analysis, 38 with high HOXB-AS3 for KRAS mutation analysis, 116 with low HOXB-AS3 for TET2 mutation analysis, and 38 with high HOXB-AS3 and 112 with low HOXB-AS3 for ZRSR2 mutation analysis. All other mutations were analyzed in total cohort.

## Supplementary Figures

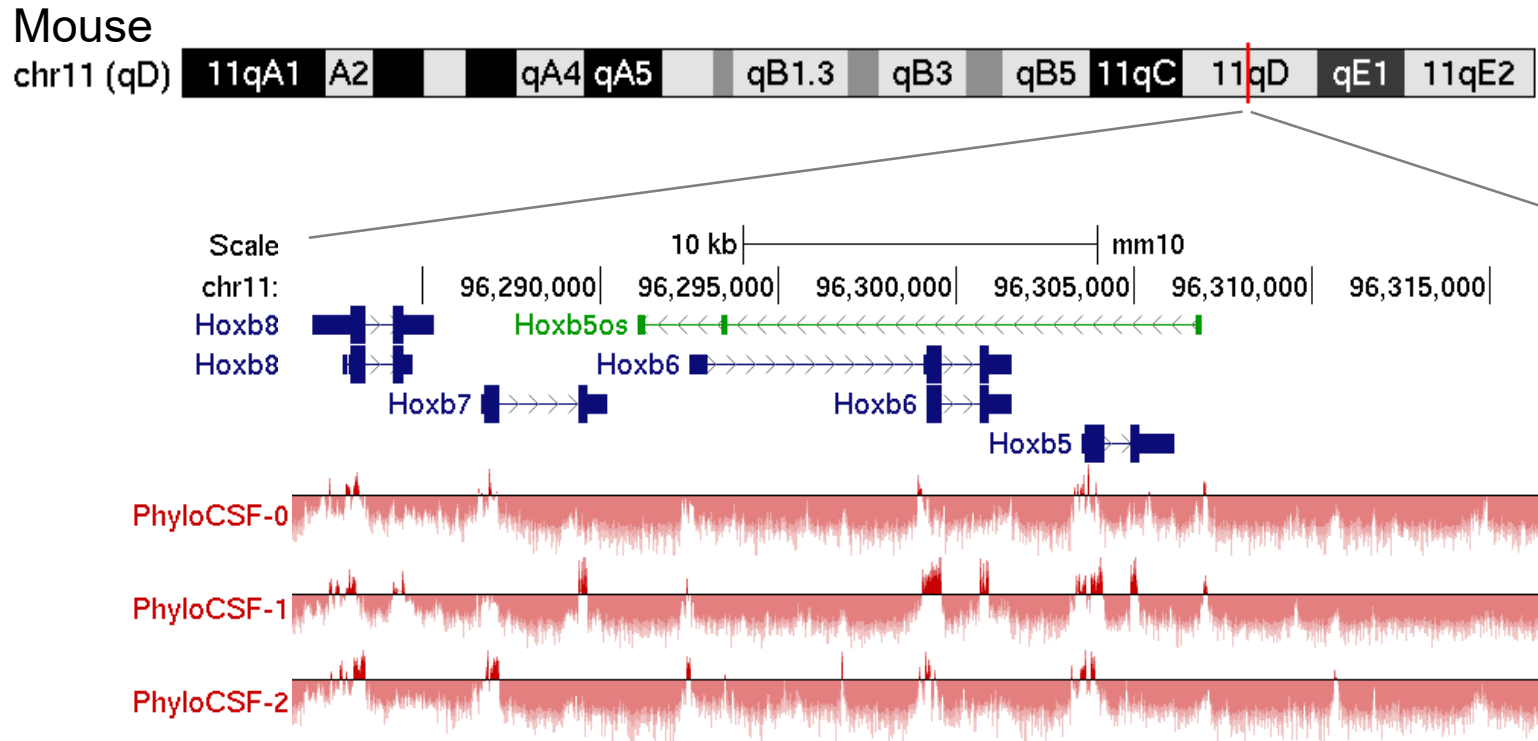

**Figure S1. Overview of *Hoxb5os* in mouse HOXB cluster.** Mouse HOXB cluster is located at mouse chromosome 11. An anti-sense transcript, *Hoxb5os*, is overlapped with *Hoxb5* and *Hoxb6*. The genomic data from ENCODE project are taken from UCSC genome browser.

HOXB-AS3 in patients with myeloid malignancies

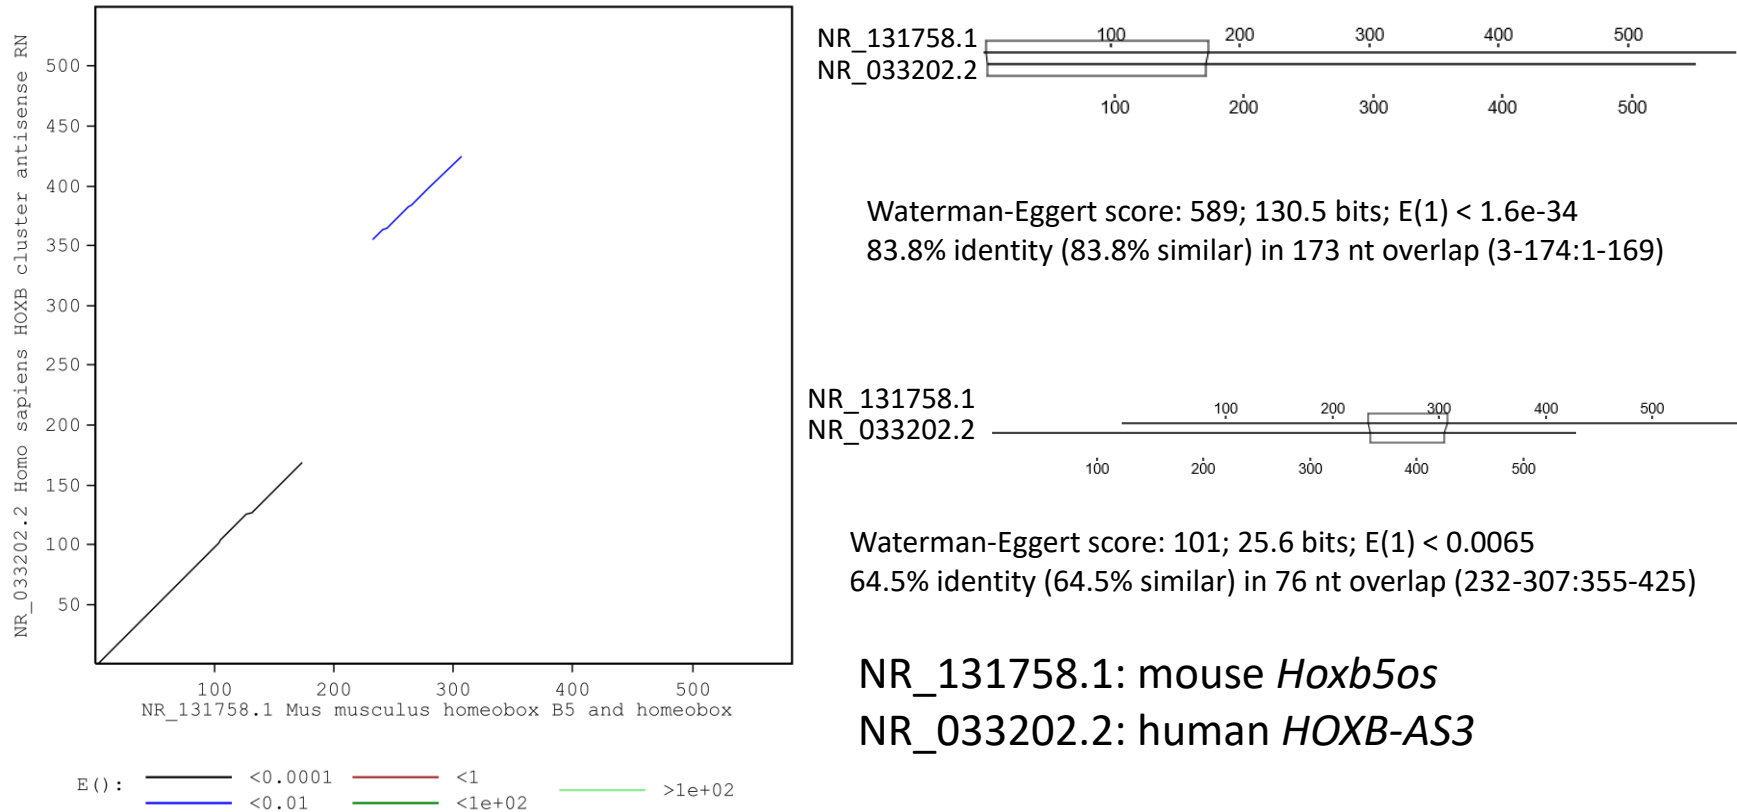

**Figure S2. Alignment of mouse *Hoxb5os* and human *HOXB-AS3*.** The nucleotide comparison between human *HOXB-AS3* and mouse *Hoxb5os*. NR\_131758.1 is mouse *Hoxb5os*, and NR\_033202.2 is human *HOXB-AS3*. Two conserved areas are computed and demonstrated by plalign (<http://fasta.bioch.virginia.edu/>).

HOXB-AS3 in patients with myeloid malignancies

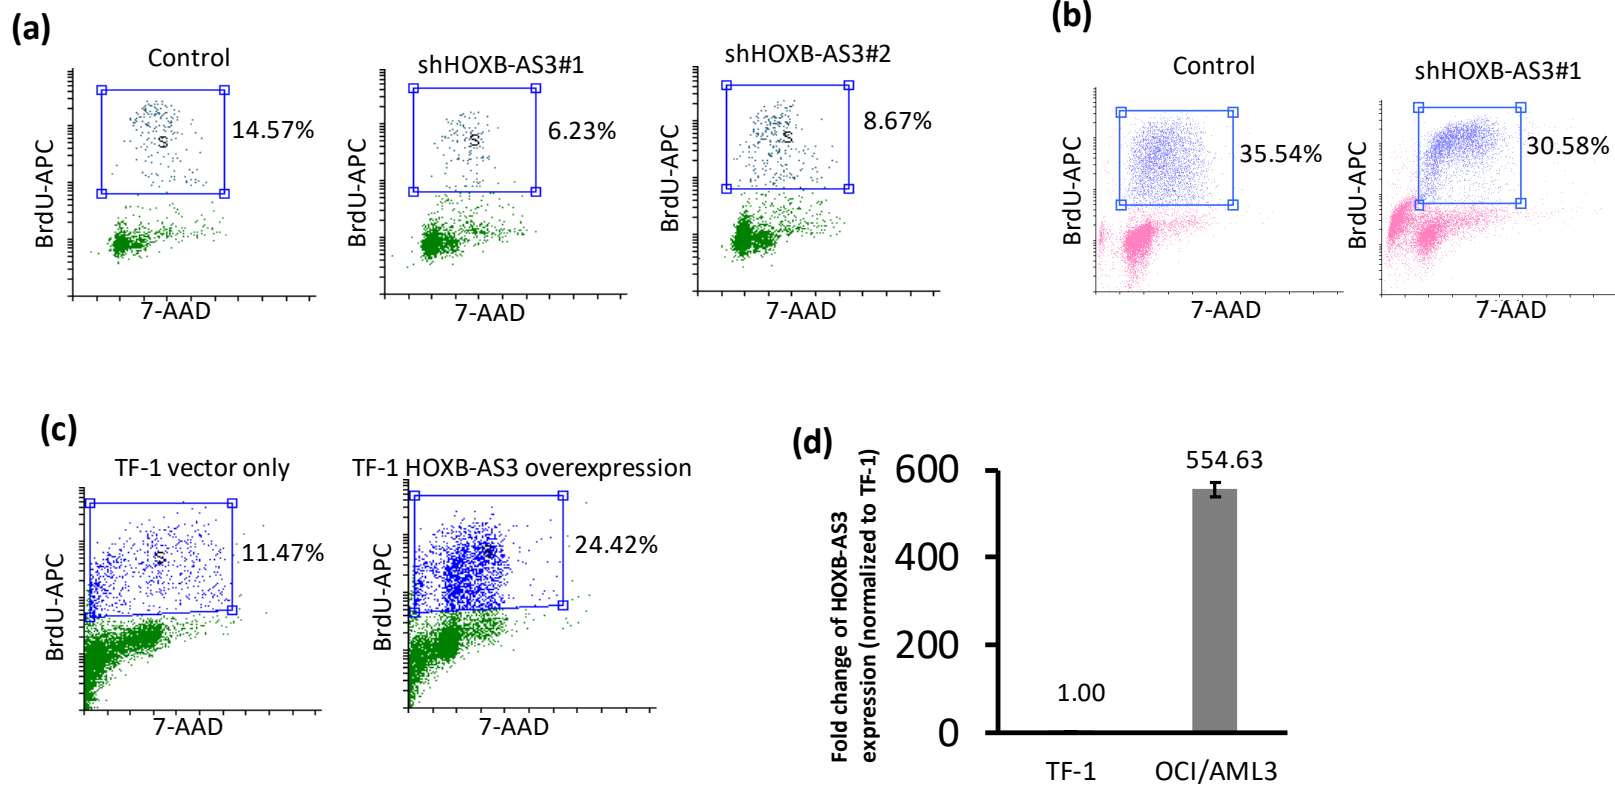

**Figure S3. HOXB-AS3 promotes S phase entering in the cell cycle regulation.** (a) Representative data of BrdU flow assay of the cells shown in Figure 2c. (b) Representative data of BrdU flow assay of the cells shown in Figure 2e. (c) Representative data of BrdU flow assay of the cells shown in Figure 2g. (d) HOXB-AS3 expression is higher in OCI/AML3 cells than that in TF-1 cells. (\* meant that P value was less than 0.05.)

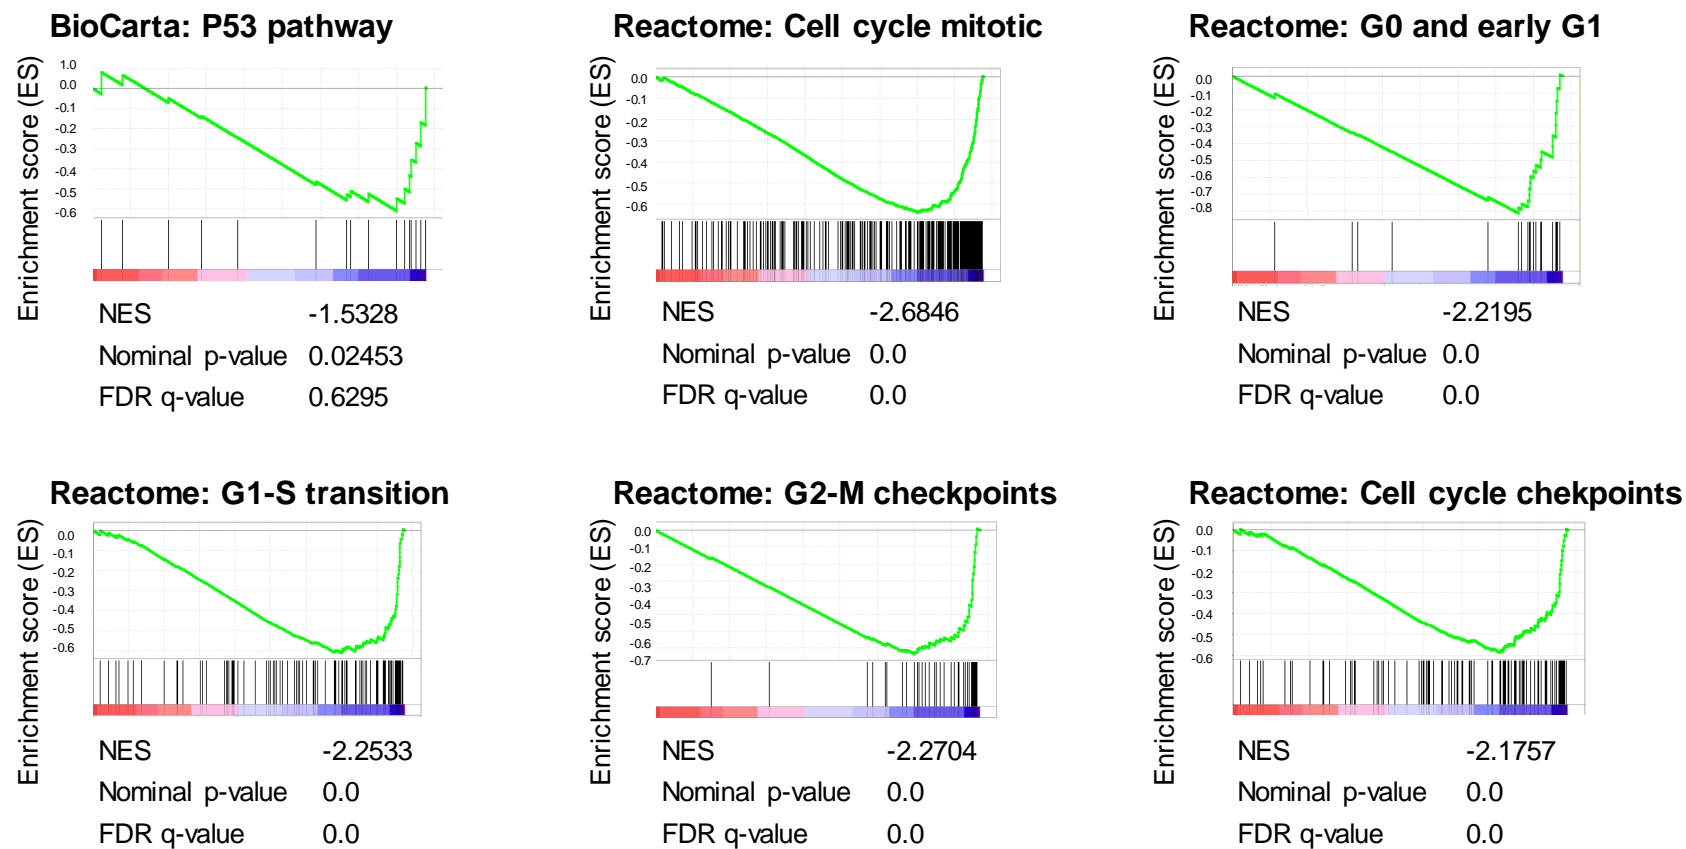

**Figure S4. GSEA pathway analysis of the differentially expressed genes in *HOXB-AS3* knockdown cells compared to the control cells. All pathways in this figure were contributed by Reactome or BioCarta.**

HOXB-AS3 in patients with myeloid malignancies

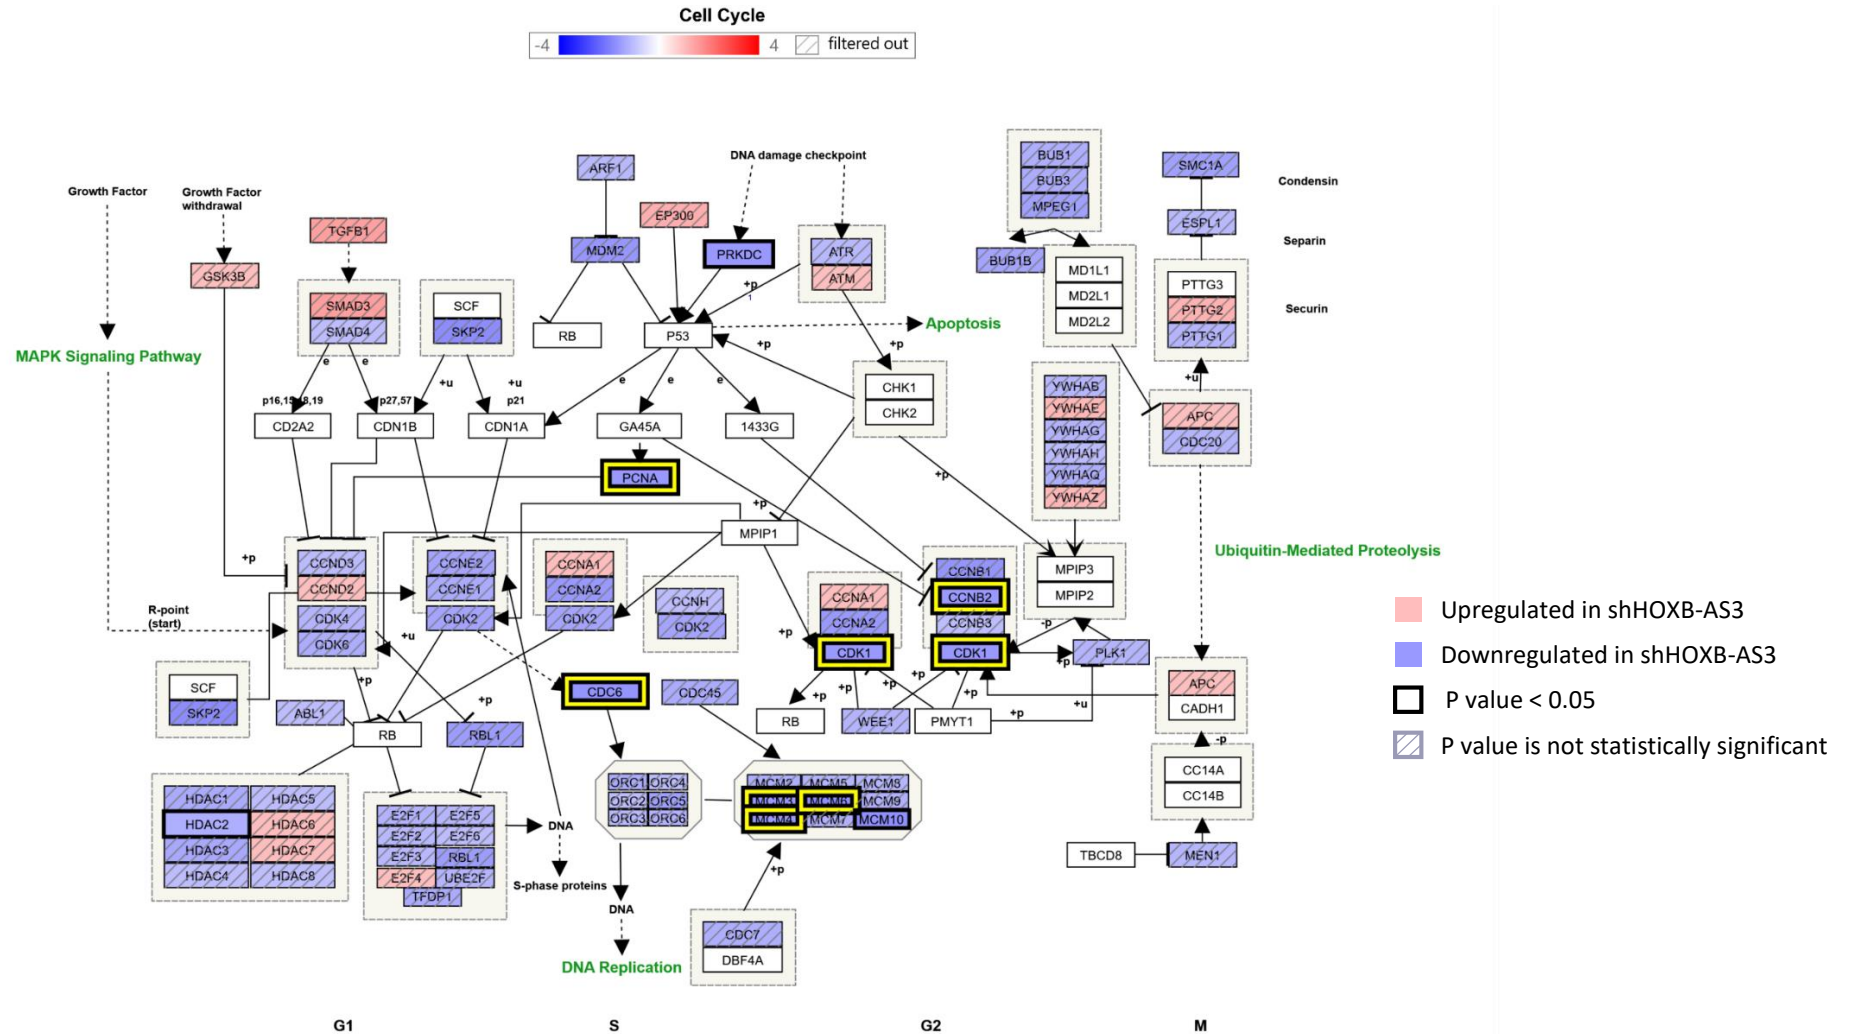

**Figure S5. Cell cycle pathway from Wikipathway analysis of downstream pathways affected by downregulation of *HOXB-AS3* in the myeloid cell lines.** The figure and analysis were computed by Affymetrix® TAC software.

HOXB-AS3 in patients with myeloid malignancies

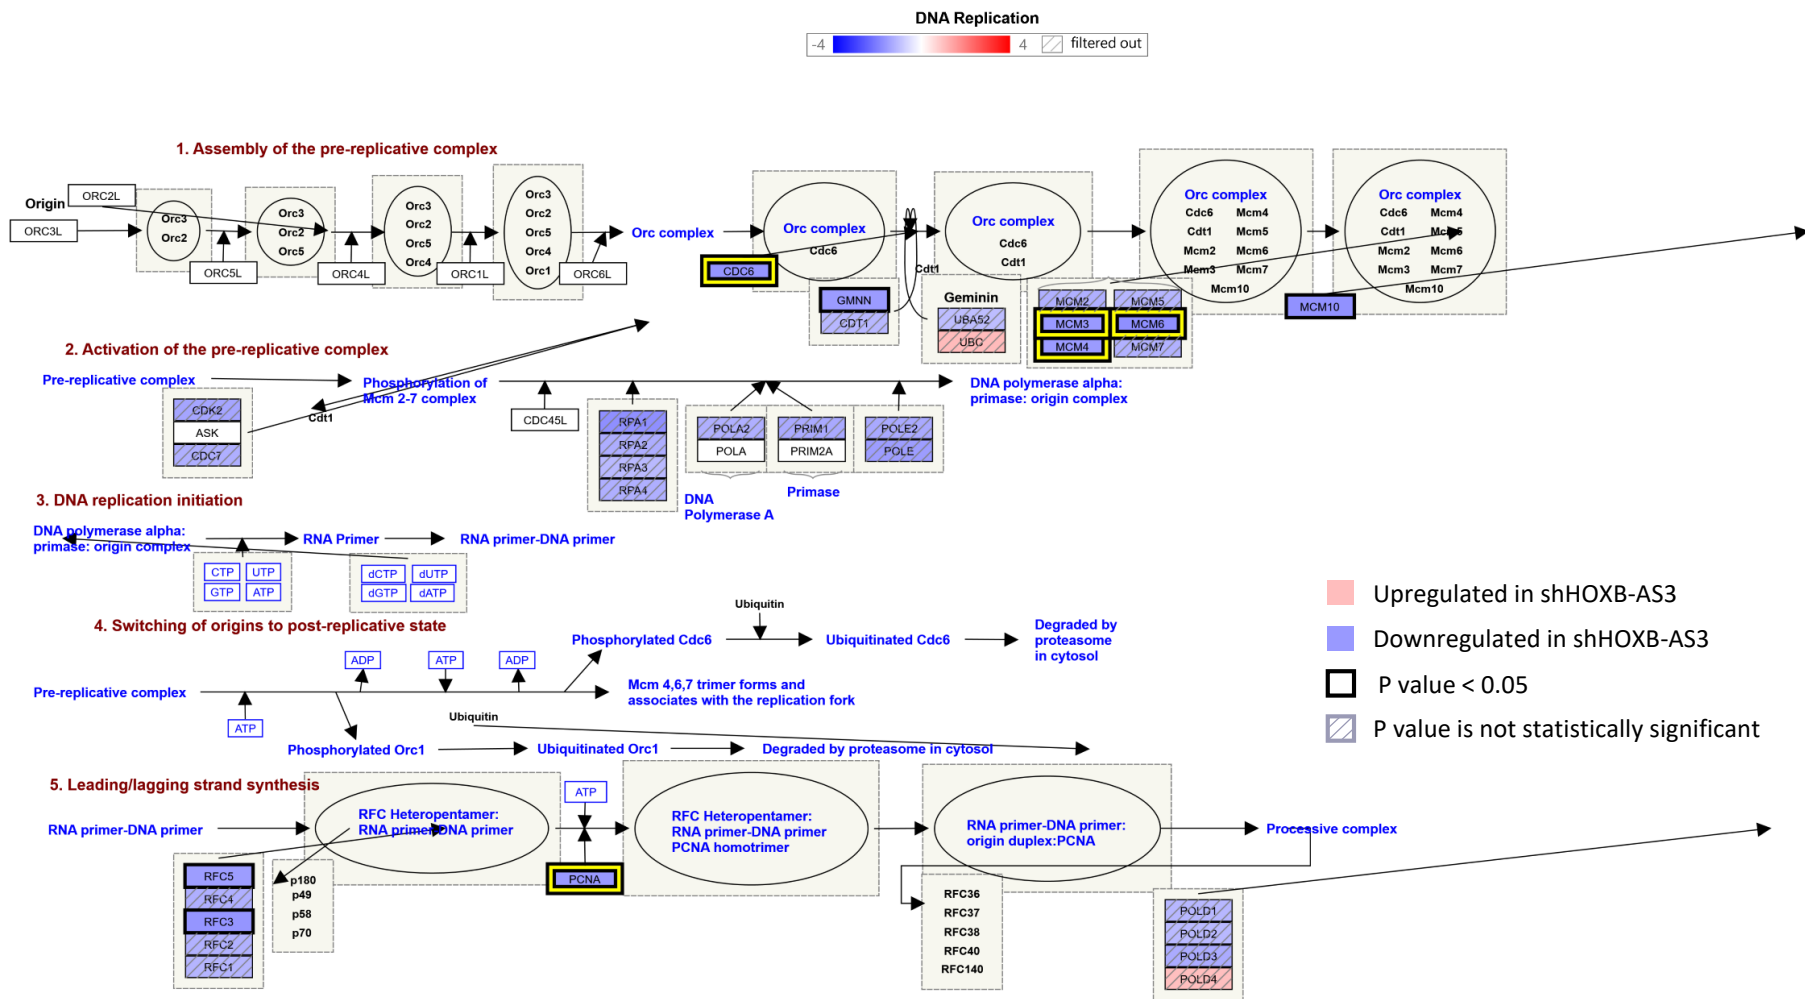

Figure S6. DNA replication pathway from Wikipathway analysis of downstream pathways affected by downregulation of *HOXB-AS3* in the myeloid cell lines. The figure and analysis were computed by Affymetrix® TAC software.



HOXB-AS3 in patients with myeloid malignancies

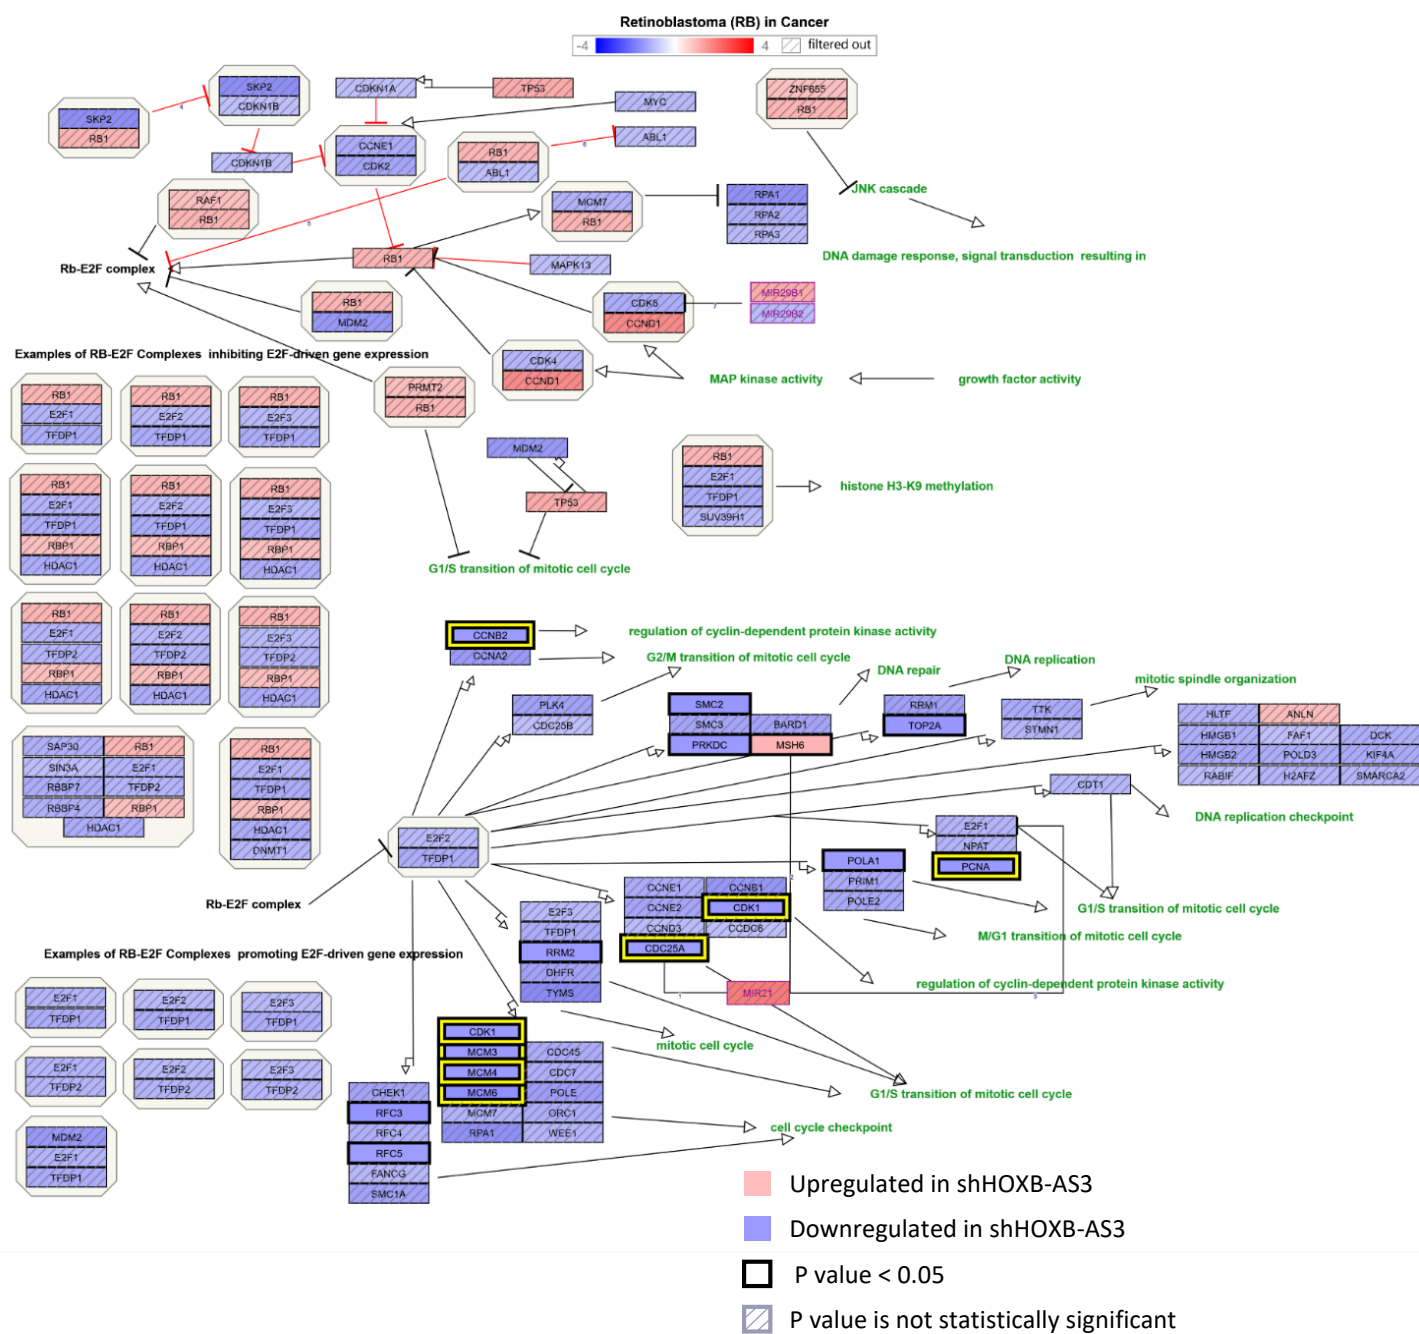

Figure S7. RB pathway from Wikipathway analysis of downstream pathways affected by downregulation of *HOXB-AS3* in the myeloid cell lines. The figure and analysis were computed by Affymetrix® TAC software.

HOXB-AS3 in patients with myeloid malignancies

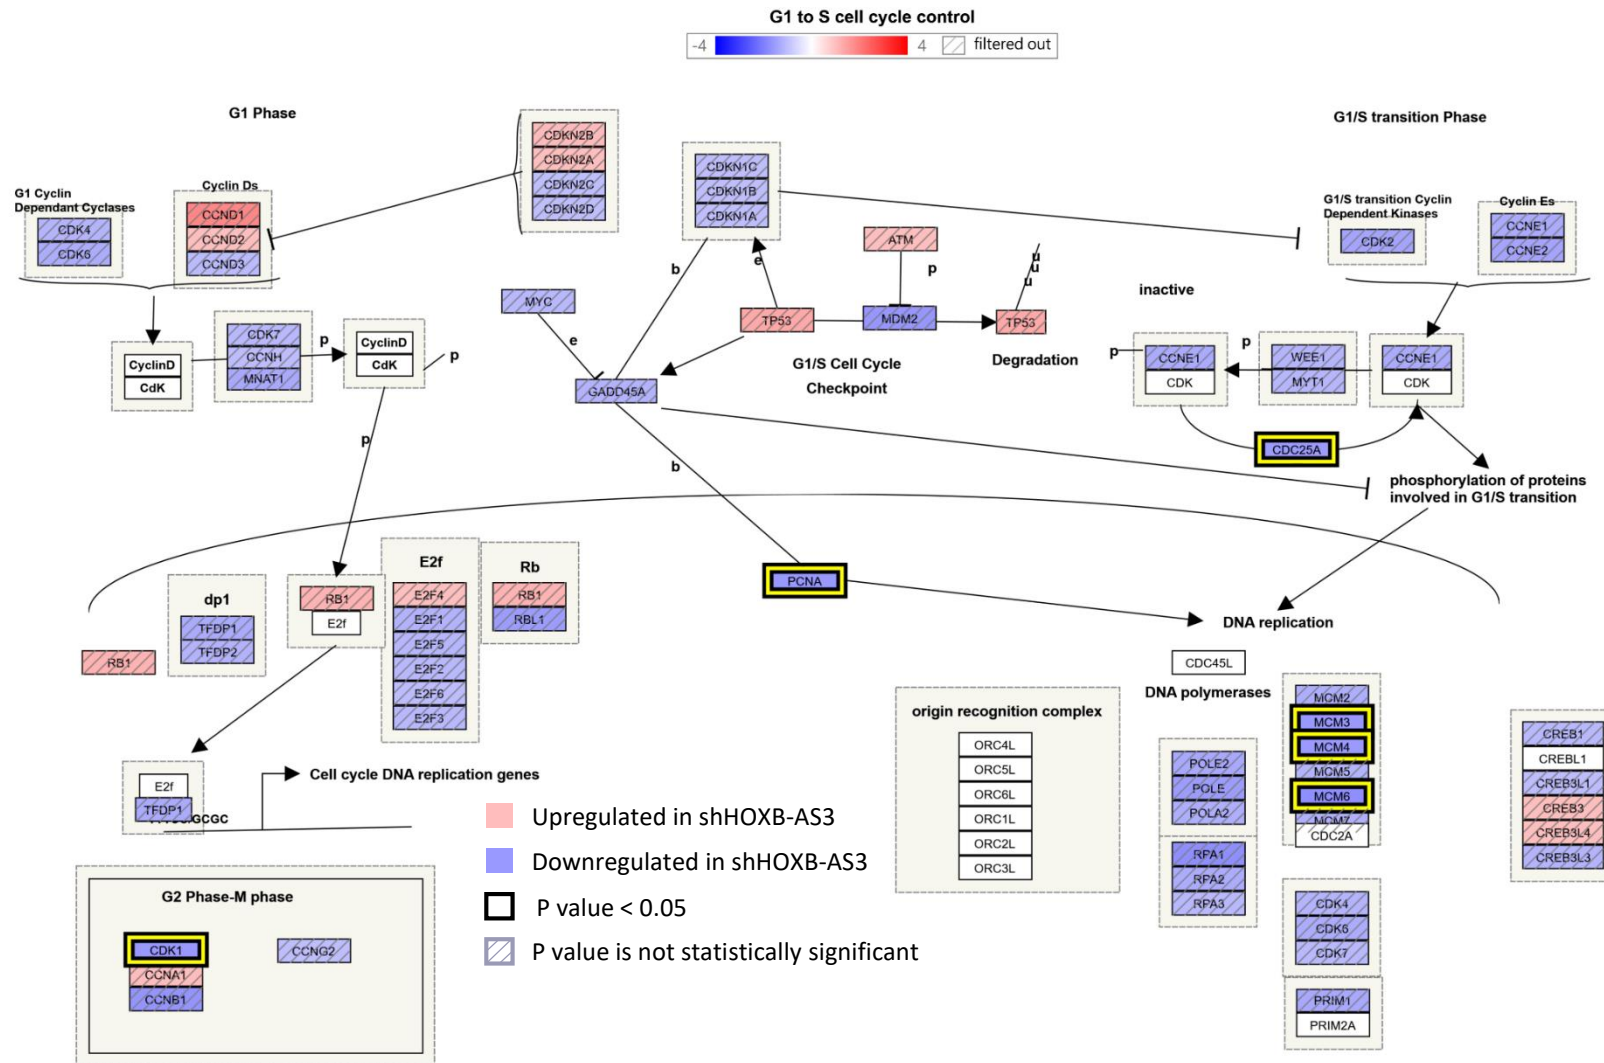

Figure S8. G1-S pathway from Wikipathway analysis of downstream pathways affected by downregulation of *HOXB-AS3* in the myeloid cell lines. The figure and analysis were computed by Affymetrix® TAC software.

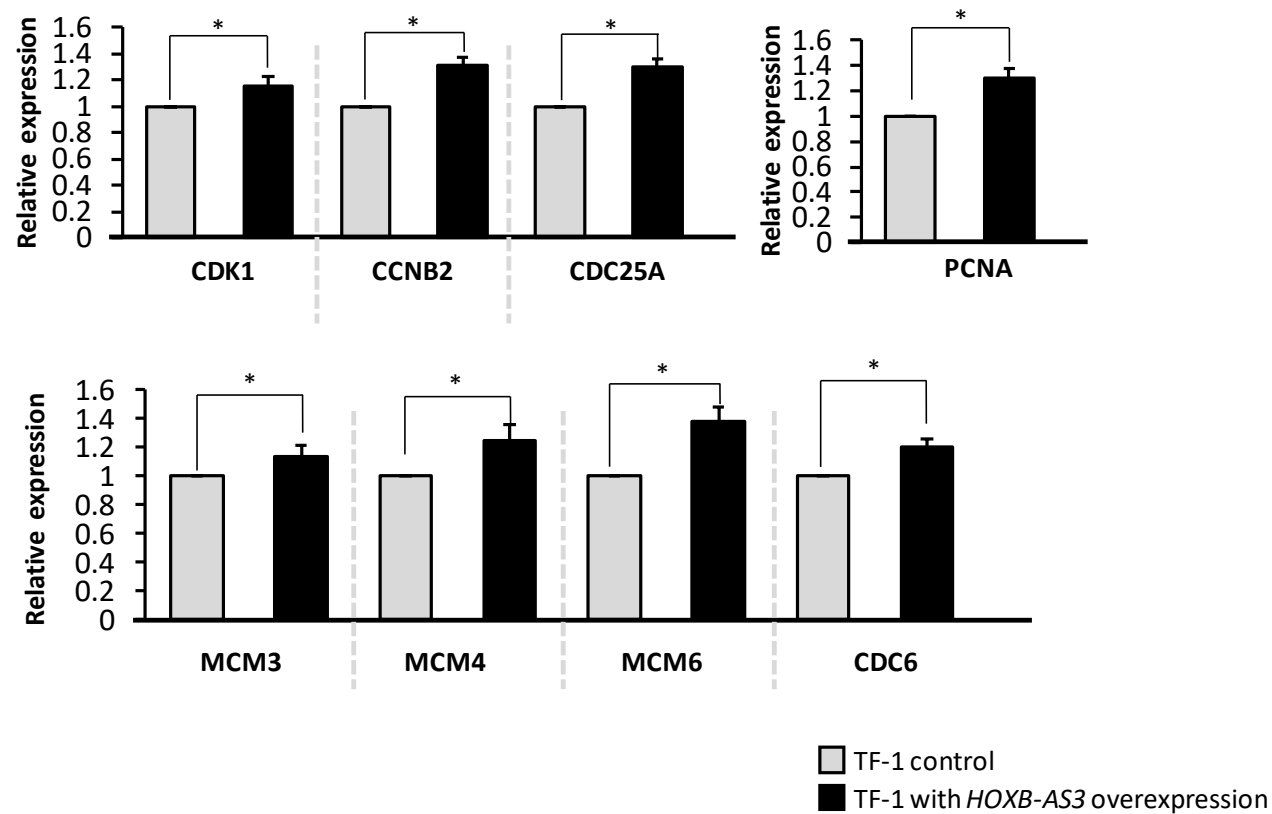

**Figure S9.** Quantitative PCR analysis of the expressions of indicated genes in TF-1 cells infected with lentivirus carrying pAS5.1w-Pbsd (control), or pAS5.1w-Pbsd-HOXB-AS3 (*HOXB-AS3* overexpression). Data were derived from the triple repeats of experiments. P values were calculated by Kruskal-Wallis test. (\* meant that P value was less than 0.05.)

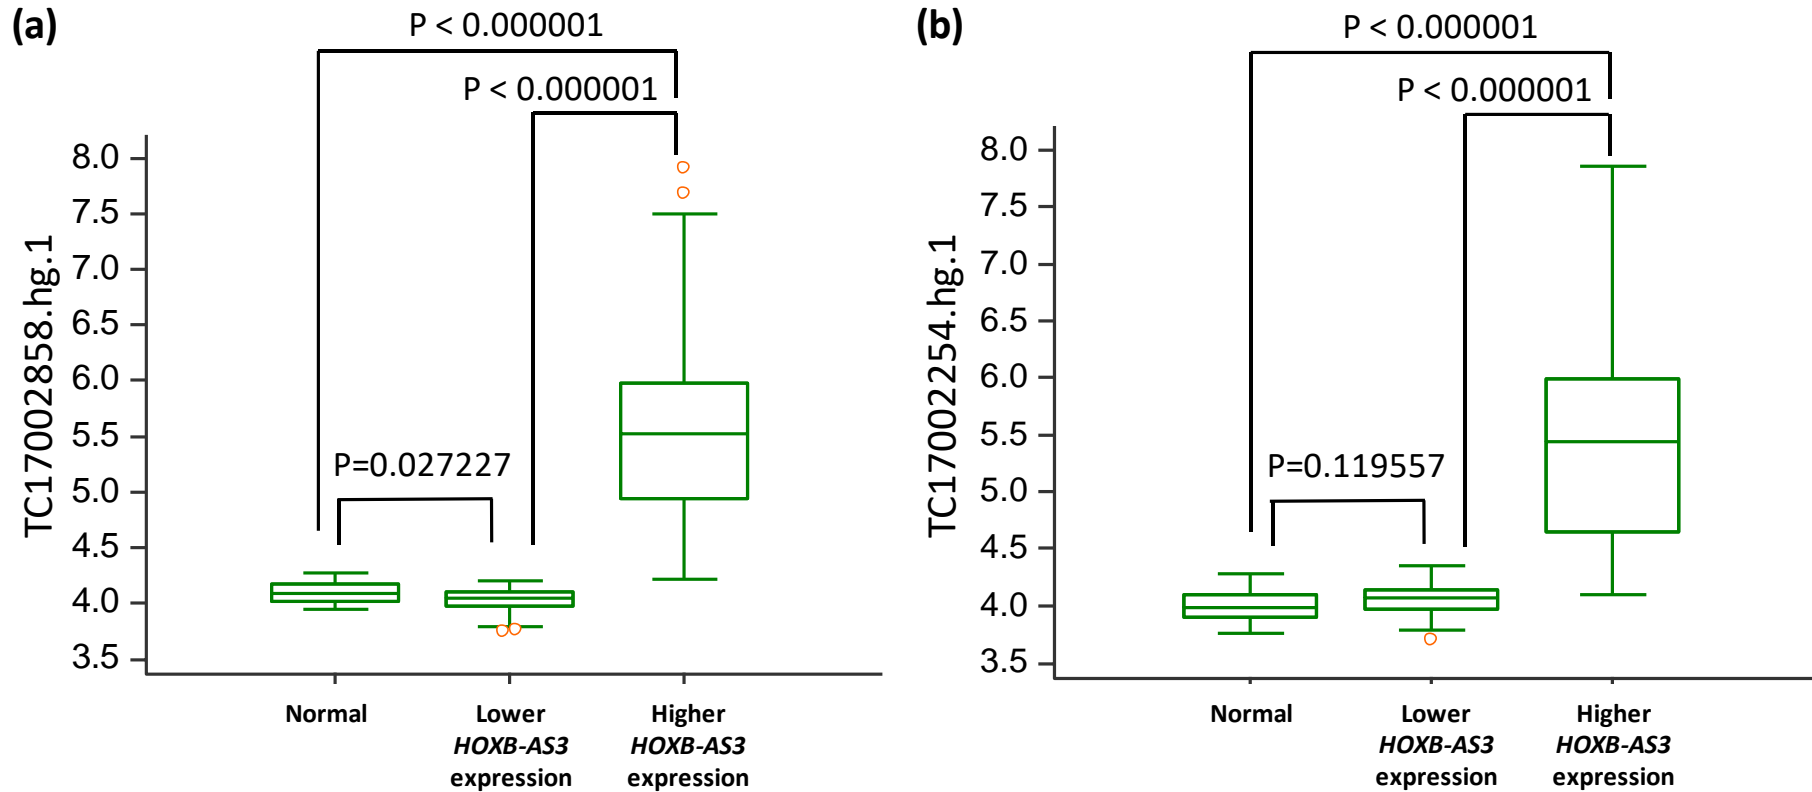

**Figure S10. HOXB-AS3 expressions of AML patients and health donors.** (a) Transcript cluster: TC17002858.hg.1, and (b) Transcript cluster: TC17002254.hg.1 on Affymetrix GeneChip® HTA 2.0 arrays.

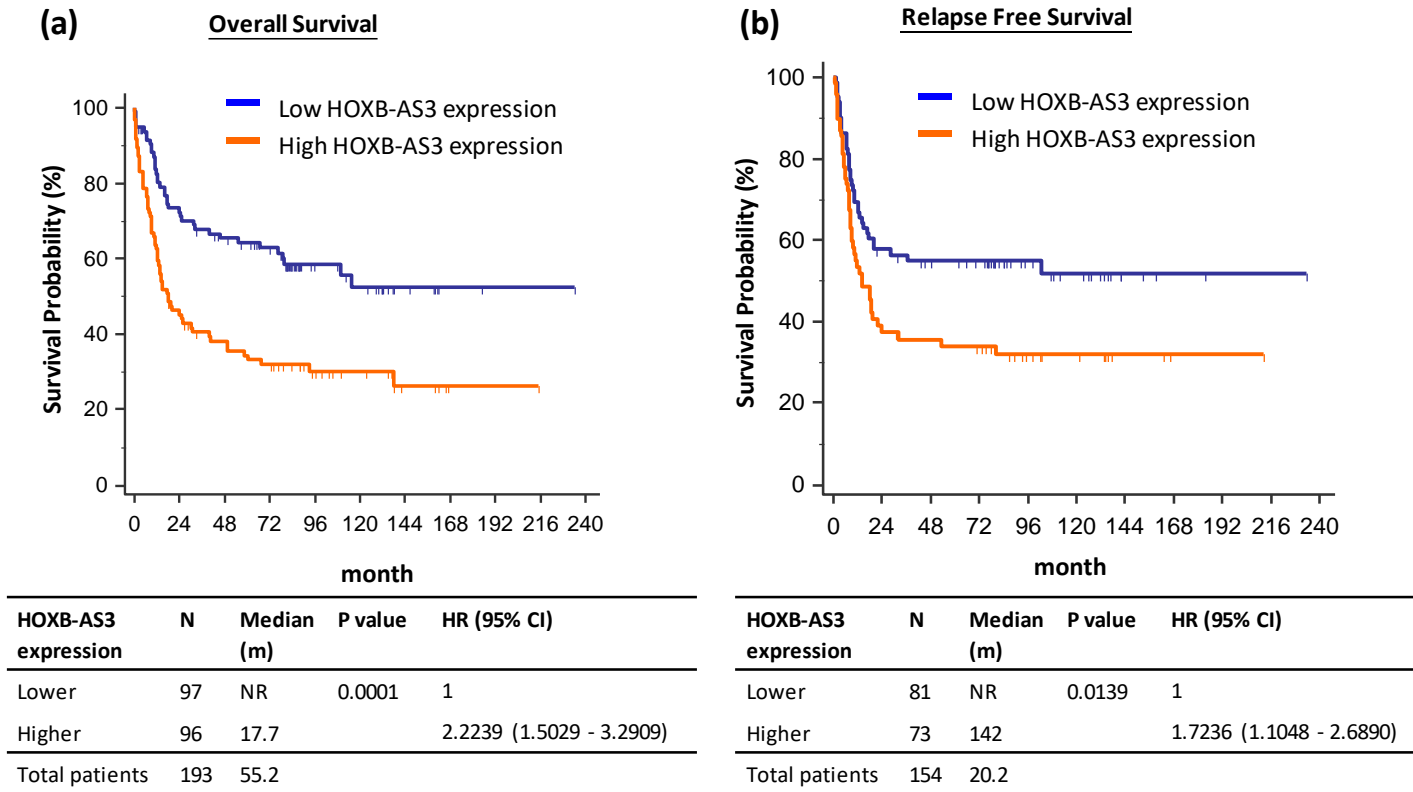

**Figure S11. Survival analysis of *de novo* AML patients stratified by the expressions of *HOXB-AS3*.** (a) Overall survival (OS) in the NTUH AML cohort. (b) Relapse free survival in the NTUH AML cohort. The patients in the NTUH AML cohort were stratified by the expressions of transcript cluster: TC17002254.hg.1 on Affymetrix GeneChip® HTA 2.0 arrays.

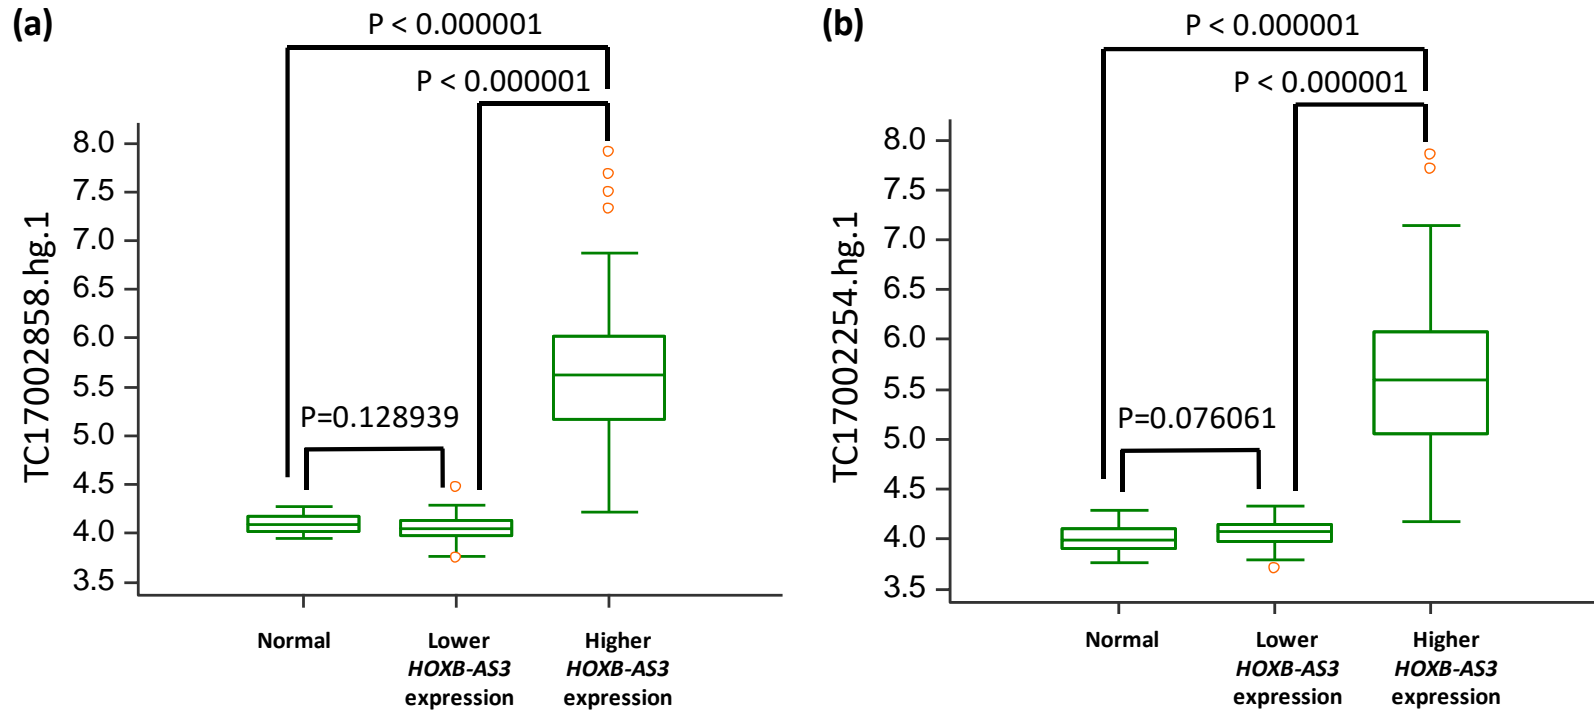

**Figure S12. HOXB-AS3 expression of non-APL AML patients and health donors. (a)** Transcript cluster: TC17002858.hg.1, and **(b)** Transcript cluster: TC17002254.hg.1 on Affymetrix GeneChip® HTA 2.0 arrays.

HOXB-AS3 in patients with myeloid malignancies

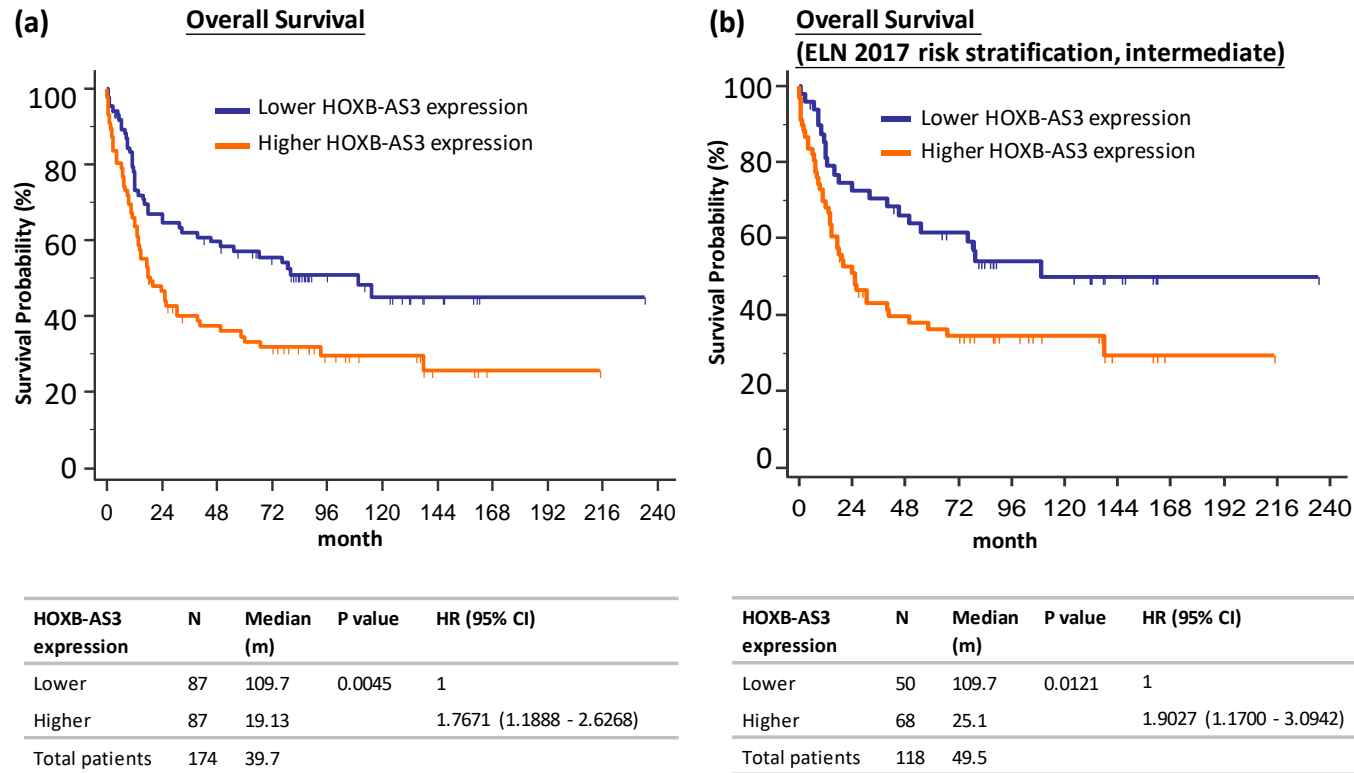

**Figure S13. Survival analysis of non-APL AML patients stratified by the expressions of *HOXB-AS3* in the NTUH AML cohort. (a) Overall survival (OS), (b) OS of the patients with intermediate risk of ELN 2017 risk stratification. The patients in the NTUH AML cohort were stratified by the expressions of transcript cluster: TC17002858.hg.1 on Affymetrix GeneChip® HTA 2.0 arrays.**

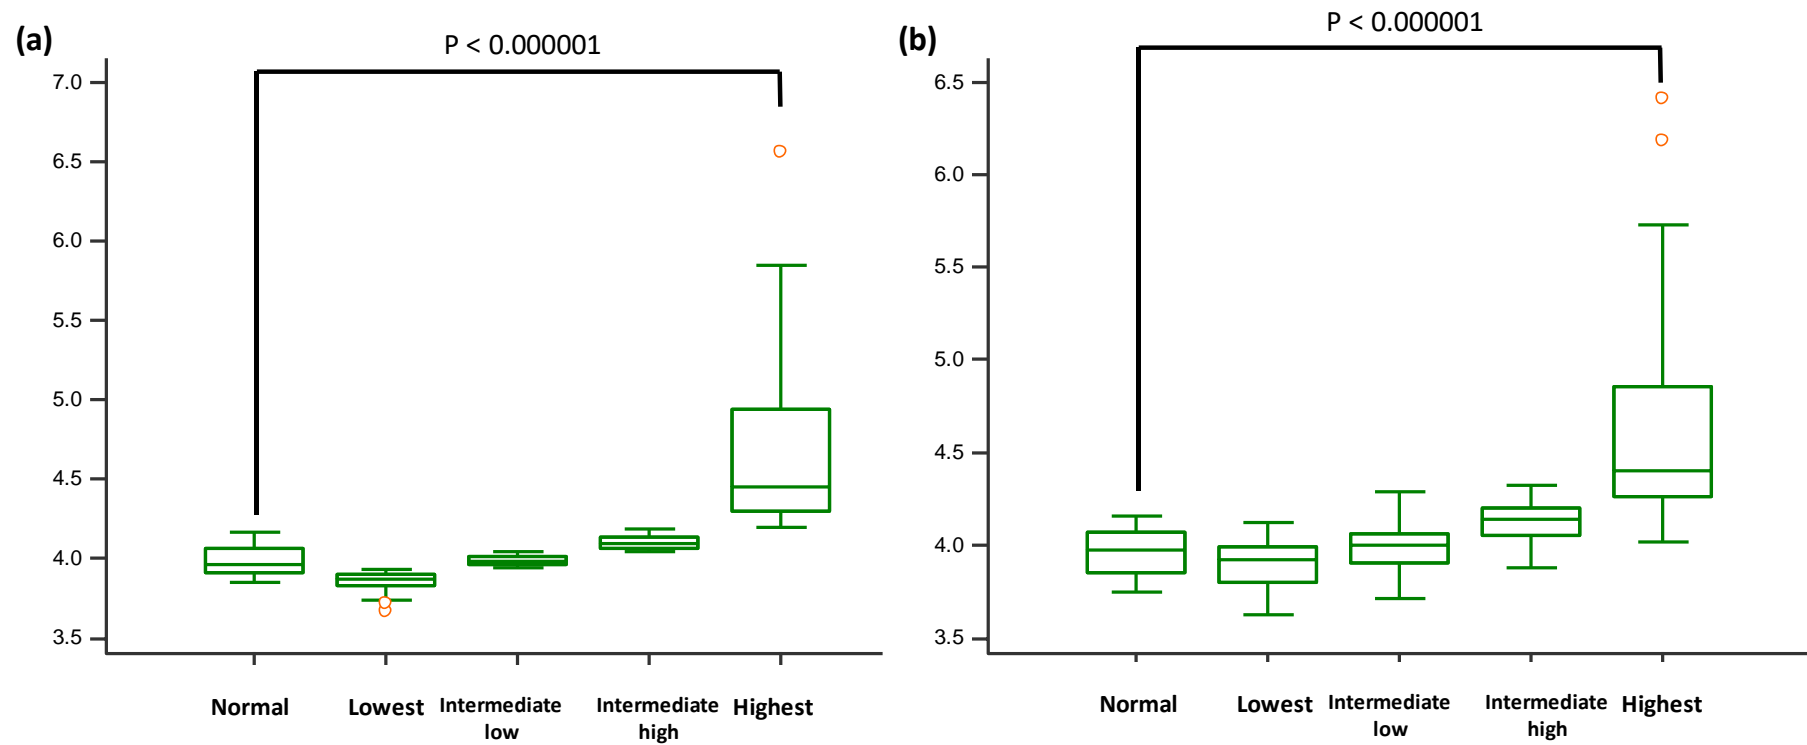

**Figure S14. HOXB-AS3 expressions of MDS patients and health donors. (a)** Transcript cluster: TC17002858.hg.1, and **(b)** Transcript cluster: TC17002254.hg.1 on Affymetrix GeneChip® HTA 2.0 arrays.



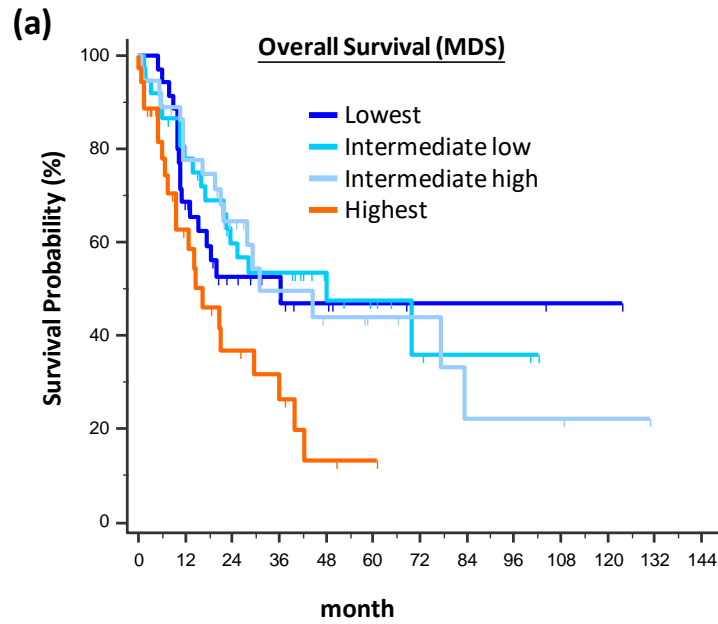

| HOXB-AS3 expression | N  | Median OS (m) | P value | HR (95% CI)              |
|---------------------|----|---------------|---------|--------------------------|
| Lowest              | 39 | 36.4          | 0.0212  | 1                        |
| Intermediate low    | 40 | 48.1          |         | 0.8633 (0.4671 - 1.5957) |
| Intermediate high   | 39 | 30.9          |         | 0.9151 (0.4911 - 1.7055) |
| Highest             | 39 | 16.5          |         | 1.9902 (0.9526 - 4.1576) |

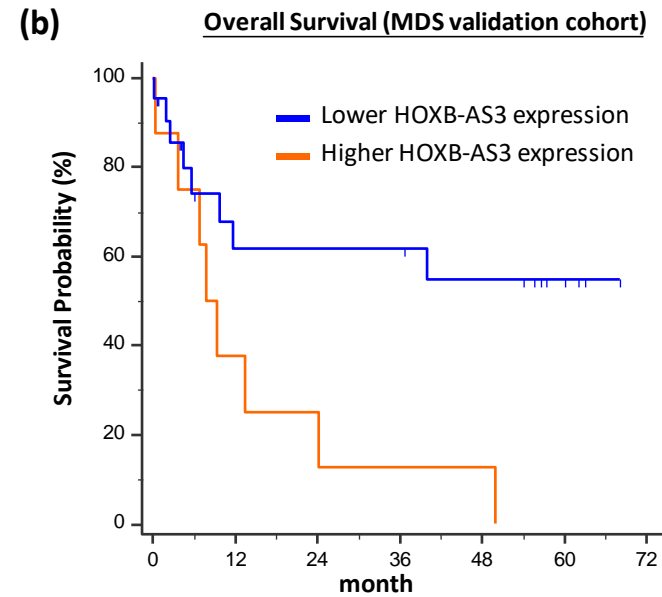

| HOXB-AS3 expression | N  | Median OS (m) | P value | HR (95% CI)              |
|---------------------|----|---------------|---------|--------------------------|
| Lower               | 21 | NR            | 0.0147  | 1                        |
| Higher              | 9  | 7.8           |         | 3.1350 (0.9983 - 9.8449) |
| Total patients      | 30 | 13.5          |         |                          |

**Figure S15. Overall survival of MDS patients stratified by the expressions of HOXB-AS3.** (a) OS in the NTUH MDS training cohort. (b) OS in the NTUH MDS validation cohort. The patients were stratified by the expressions of transcript cluster: TC17002254.hg.1 on Affymetrix GeneChip® HTA 2.0 arrays.

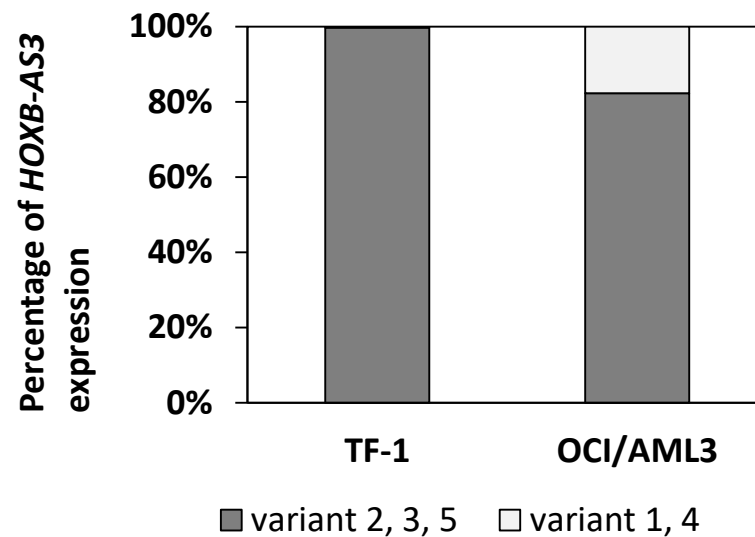

Figure S16. Quantitative PCR analysis of the expressions of different variants in TF-1 and OCI/AML3 cell lines.

## **Supplementary References**

1. Subramanian A, Tamayo P, Mootha VK, Mukherjee S, Ebert BL, Gillette MA, Paulovich A, Pomeroy SL, Golub TR, Lander ES *et al*: **Gene set enrichment analysis: a knowledge-based approach for interpreting genome-wide expression profiles**. *Proc Natl Acad Sci U S A* 2005, **102**(43):15545-15550.
2. Mootha VK, Lindgren CM, Eriksson KF, Subramanian A, Sihag S, Lehar J, Puigserver P, Carlsson E, Ridderstrale M, Laurila E *et al*: **PGC-1alpha-responsive genes involved in oxidative phosphorylation are coordinately downregulated in human diabetes**. *Nat Genet* 2003, **34**(3):267-273.
3. Wang Y, Zhu W, Levy DE: **Nuclear and cytoplasmic mRNA quantification by SYBR green based real-time RT-PCR**. *Methods* 2006, **39**(4):356-362.
